# Supplementary material for: Thermoresponsive nanoparticles + plasmonic nanoparticles = photoresponsive heterodimers: facile synthesis and sunlight-induced reversible clustering
Source: Royal Society of Chemistry journal article supplement (doi:10.1039/c3cc42273a), 2013-01-01
Supplement: c3cc42273a.pdf [file c3cc42273a.pdf]

## Electronic Supplementary Information

# Thermoresponsive Nanoparticles + Plasmonic Nanoparticles = Photoresponsive Heterodimers: Facile Synthesis and Sunlight-Induced Reversible Clustering

Hui Han, Jim Yang Lee, and Xianmao Lu\*

*\*Department of Chemical & Biomolecular Engineering, National University of Singapore,  
Singapore 117576*

*E-mail: chelxm@nus.edu.sg; Fax: +65 6779 1936; Tel: +65 6516 1071*

### Experimental

*Synthesis of Fe<sub>3</sub>O<sub>4</sub> magnetic nanoparticles:* The magnetic nanoparticles were prepared based on the method reported by Park *et al.* (Ultra-Large-Scale Syntheses of Monodisperse Nanocrystals. *Nat. Mater.* **2004**, 3, 891) First, iron oleate complex was synthesized as follows: 3.6 g of iron (III) chloride hexahydrate (FeCl<sub>3</sub>·6H<sub>2</sub>O, ≥98%, Sigma-Aldrich) was dissolved in 20 mL deionized water (DI water). 14.1 g of sodium oleate (≥82%, Sigma) was dissolved in a mixed solvent containing 26.7 mL of ethanol (HPLC, Fisher) and 46.7 mL of hexane (AR, Fisher). The two resulting solutions were mixed and heated to 70 °C for 4 h. Afterwards, the upper organic layer was washed three times with 10 mL DI water in a separatory funnel. Hexane was then evaporated in a rotary evaporator at 65 °C for 2 h until a waxy solid form of iron oleate complex was obtained. Fe<sub>3</sub>O<sub>4</sub> nanoparticles were synthesized by thermo-decomposition. Iron oleate complex (12 g) and oleic acid (1.9 g, 90 %, Aldrich) were dissolved in 1-octadecene (66.67 g, 90 %, Aldrich). The mixture was heated to 315 °C with a heating rate of ~3 °C·min<sup>-1</sup>. The reaction was allowed to proceed at 315 °C for 30 min. The resulting Fe<sub>3</sub>O<sub>4</sub> nanoparticles were washed with hexane and acetone and collected with centrifugation at 9000 rpm for 20 min. The washing and precipitating cycles were repeated for at least 3 times.

*Synthesis of Ag-Fe<sub>3</sub>O<sub>4</sub> heterodimers:* 10 mg of the Fe<sub>3</sub>O<sub>4</sub> nanoparticles, 10 mg of silver acetate (CH<sub>3</sub>COOAg, 99 %, Sigma-Aldrich), and 0.2 g of PNIPAM (Mw = 20000 ~ 40000, Nibiner-Polymer) were well dissolved in a mixed solvent containing 8 mL of toluene (AR, Fisher) and 3 mL of ethanol. The solution was kept at 60 °C with stirring for 15 h under nitrogen to form Ag-Fe<sub>3</sub>O<sub>4</sub> dimers. After reaction, the solvent was removed by rotary evaporation at 45 °C for 15 min. The resultant product can be readily dispersed in water. Fe<sub>3</sub>O<sub>4</sub> nanoparticles capped with PNIPAM were also prepared with the same procedure but without adding CH<sub>3</sub>COOAg.

*Characterizations.* The nanoparticles were characterized with Field Emission Transmission Electron Microscopy (FETEM, JEOL JEM-2100F, Japan) operated at 200 kV and Transmission Electron Microscopy (TEM, JEOL JEM-3010, Japan) operated at 300 kV. The photoresponse of the dimers was tested with a 150-W solar simulator (Newport 96000 with an AM 1.5 D filter, US). In order to remove UV and infrared light, a filter with cut-off wavelengths of 400 and 700 nm was attached. 1 mL aqueous dispersion of the Ag-Fe<sub>3</sub>O<sub>4</sub> heterodimers or Fe<sub>3</sub>O<sub>4</sub> nanoparticles with a concentration of 100 µg per mL was loaded into an open vial with 1 cm diameter. The vial was then placed under the solar simulator with stirring for 1 h. The distance between the vial to light source was about 10 cm. The ambient temperature surrounding the vial was 25 °C. The size of the nanoparticles was obtained using dynamic laser scattering on a ZetaSizer Nano system (Malvern, UK) immediately upon removal of the sample from the solar illumination. Afterwards, the sample was allowed to stay at ambient conditions for 30 min before it was vortexed for 30 seconds and tested with the ZetaSizer again. For the preparation of TEM samples, 10 µL of the sample under illumination was dropped on a copper grid followed by drying. For comparison, TEM samples were also prepared using Ag-Fe<sub>3</sub>O<sub>4</sub> dimers without solar illumination. Thermogravimetric analysis (TGA) was conducted under nitrogen protection. M-H curve was obtained with a vibrating sample magnetometer (VSM) at room temperature. The applied magnetic field was from 10000 to -10000 G and back to 10000 G again with a depth of 500 G. Background testing was also conducted with the same procedure. Before TGA and VSM tests, the Fe<sub>3</sub>O<sub>4</sub> nanoparticles and Ag-Fe<sub>3</sub>O<sub>4</sub> heterodimers were dried in oven at 75 °C overnight. Inductively coupled plasma mass spectrometry (ICP-MS) measurements were conducted to obtain the mass ratio of Fe<sub>3</sub>O<sub>4</sub> to Ag in the heterodimers by dissolving the sample in 5% nitric acid.

#### **Calculation of heat absorbed by Ag nanoparticles illuminated with solar simulator**

The average diameter of Ag particle in dimer was 6.28 nm according to TEM measurement. The density of silver is 10.49 g·cm<sup>-3</sup>. Therefore, the mass of Ag particle in one Ag-Fe<sub>3</sub>O<sub>4</sub> dimer was:

$$10.49(g \cdot \text{cm}^{-3}) \times \frac{4}{3} \pi R^3 = 10.49(g \cdot \text{cm}^{-3}) \times \frac{4}{3} \pi \times 3.14^3(\text{nm}^3) = 1.36 \times 10^{-18} g$$

According to the results of Inductively Coupled Plasma Mass Spectrometry (ICP-MS) and Thermogravimetric Analysis (TGA), the mass ratio of Ag particles in dried Ag-Fe<sub>3</sub>O<sub>4</sub> dimers

was 12.72%. The concentration of dimers for photoresponsive test was 100 µg/mL. The average volume of solvent surrounding each dimer is:

$$\frac{1.36 \times 10^{-18} (g)}{12.72\% \times 100 (\frac{\mu g}{mL})} = 1.07 \times 10^{-13} mL$$

The intensity of visible light (400~700 nm) from the solar simulator (AM 1.5 direct) is ~1 W·m<sup>-2</sup>·nm<sup>-1</sup>. The visible light absorption of Ag-Fe<sub>3</sub>O<sub>4</sub> dimers is shown in Fig. S5. The diameter of the sample vial was 1 cm. 1 mL of the dimer dispersion was illuminated with solar simulator. Therefore, the total heat absorbed by the Ag nanoparticle of a dimer in 1 h is:

$$\begin{aligned} Q &= \frac{\sum_{i=400}^{i=700} I_i \times t \times S}{N} \\ &= \frac{\sum_{i=400}^{i=700} I_0 \times (1 - 10^{-A_i}) \times t \times S}{N} \\ &= 1.6 \times 10^{-12} J \end{aligned}$$

Where  $Q$  is the absorbed heat,  $I_i$  is the intensity of absorbed light,  $I_0$  is the incident light intensity (approximately 1 W·m<sup>-2</sup>·nm<sup>-1</sup>),  $A_i$  is the absorbance from UV-vis measurement (Figure S5),  $t$  is the illumination time,  $S$  is the illuminated area (1cm<sup>2</sup>), and  $N$  is the number of Ag particles in the sample.

The specific heat of Ag is 0.233 J·K<sup>-1</sup>·g<sup>-1</sup>. If there was no dissipation of heat to the surrounding materials, the temperature of Ag nanoparticle can increase by:

$$\frac{1.6 \times 10^{-12} (J)}{0.233 (J \cdot K^{-1} \cdot g^{-1}) \times 1.36 \times 10^{-18} (g)} = 5 \times 10^6 K$$

The specific heat of water is 4.186 J·K<sup>-1</sup>·g<sup>-1</sup>. If all the heat absorbed by Ag nanoparticles is transferred to the solvent, it will cause the fluid temperature to increase by:

$$\frac{1.6 \times 10^{-12} (J)}{4.186 (J \cdot K^{-1} \cdot g^{-1}) \times 1.07 \times 10^{-13} (g)} = 3.6 K$$

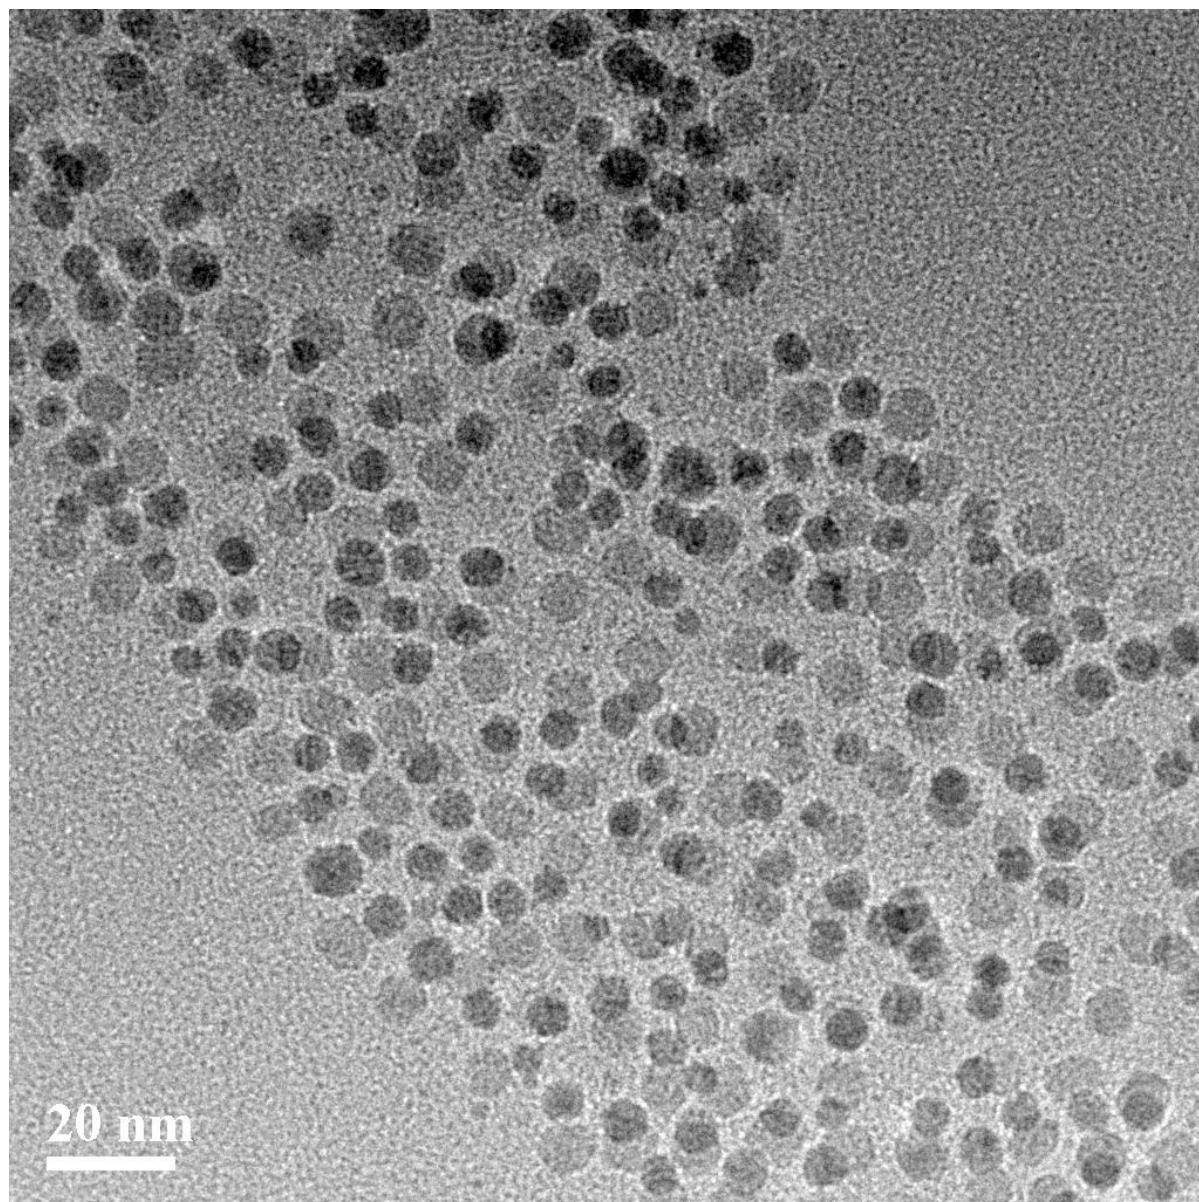

Figure S1. TEM image of Ag-F<sub>3</sub>O<sub>4</sub> heterodimers before illuminated with solar simulator.



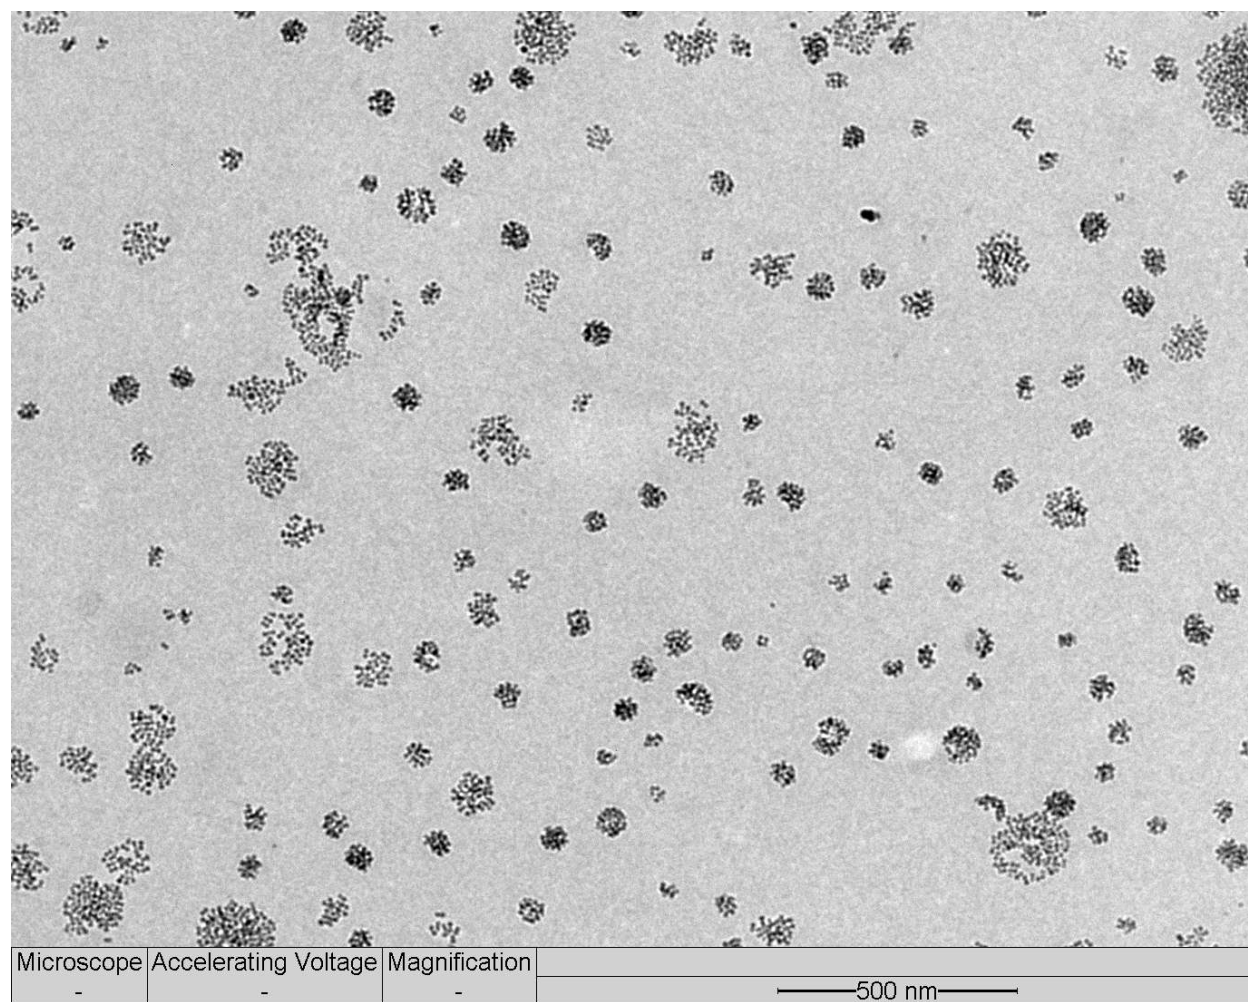

Figure S2. TEM image of Ag-F<sub>3</sub>O<sub>4</sub> heterodimers illuminated with solar simulator.

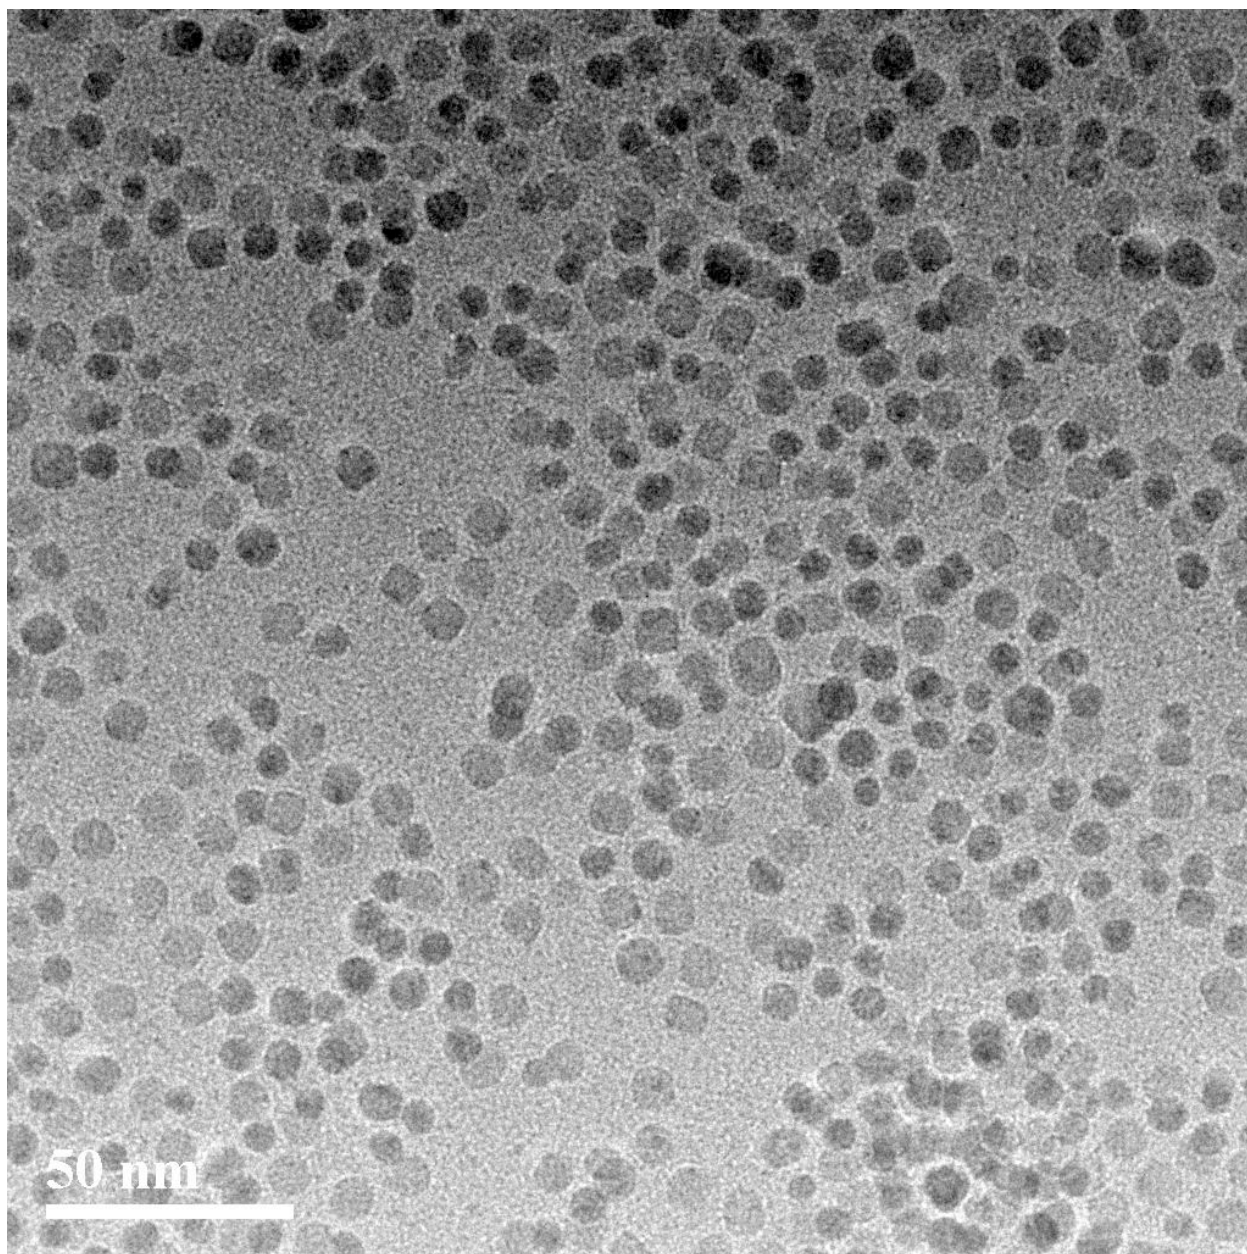

Figure S3. TEM image of re-dispersed Ag-F<sub>3</sub>O<sub>4</sub> heterodimers. The sample was prepared after 30 minutes upon removal from solar illumination and vortexed for 30 seconds.



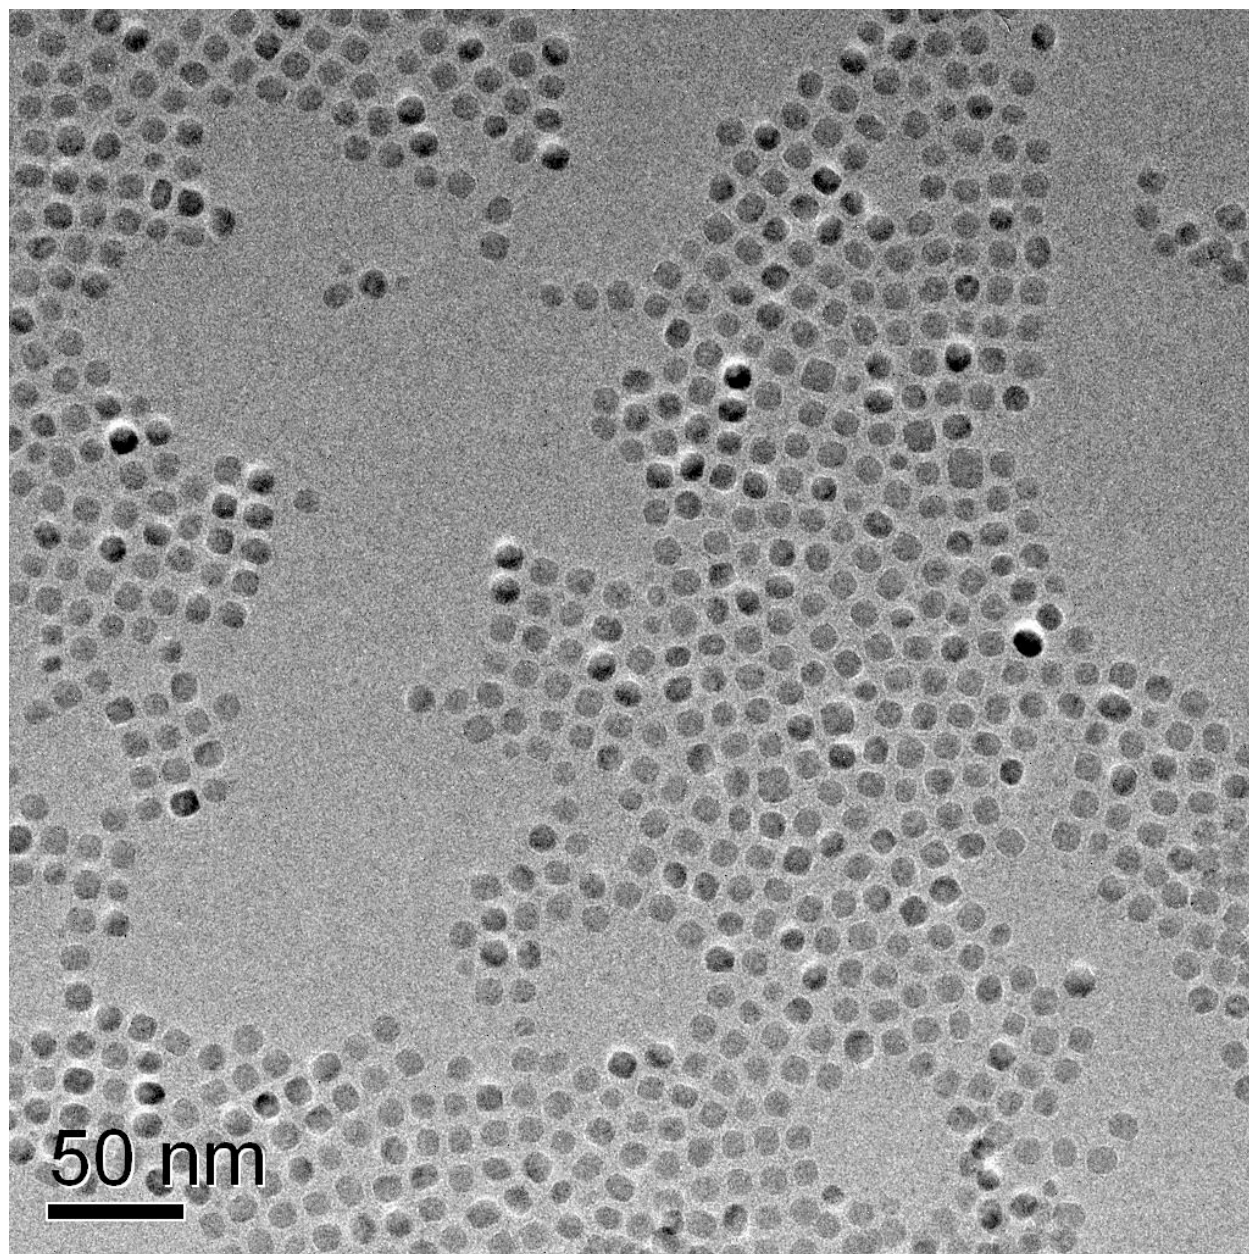

Fig. S4 TEM image of PNIPAM-capped  $\text{Fe}_3\text{O}_4$  nanoparticles after illuminated with solar simulator.

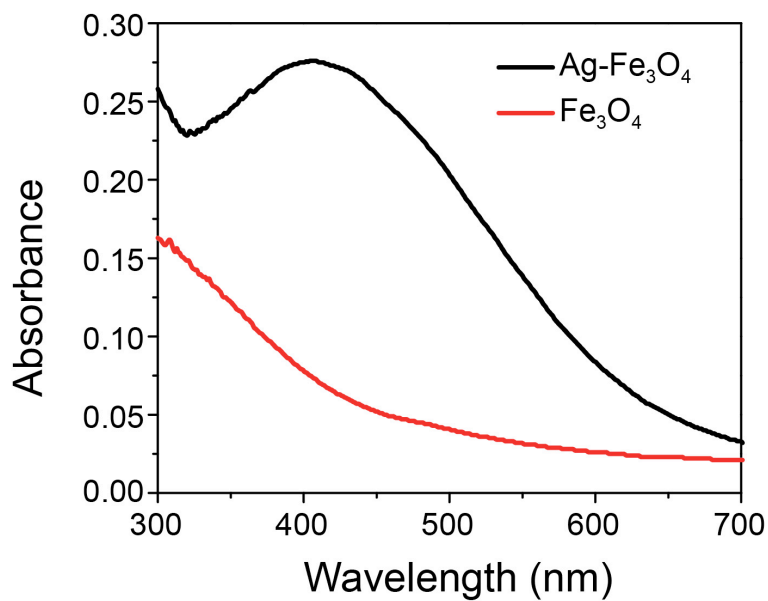

Figure S5. UV-vis spectra of  $\text{Ag-Fe}_3\text{O}_4$  heterodimers and  $\text{Fe}_3\text{O}_4$  nanoparticles.

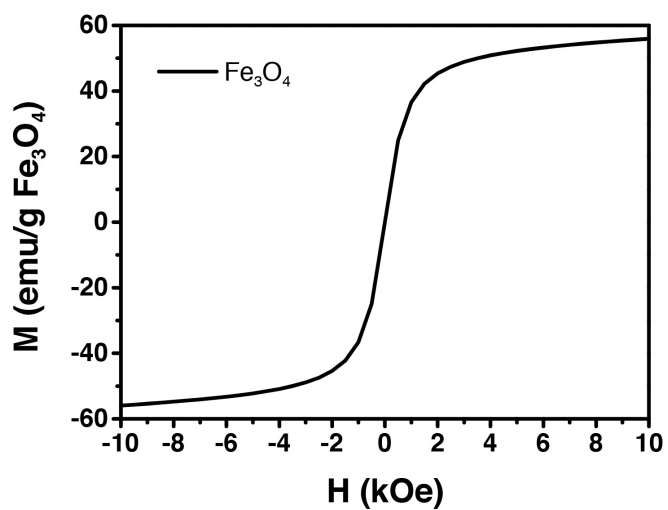

Fig. S6. Room temperature hysteresis loop of  $\text{Fe}_3\text{O}_4$  nanoparticles.



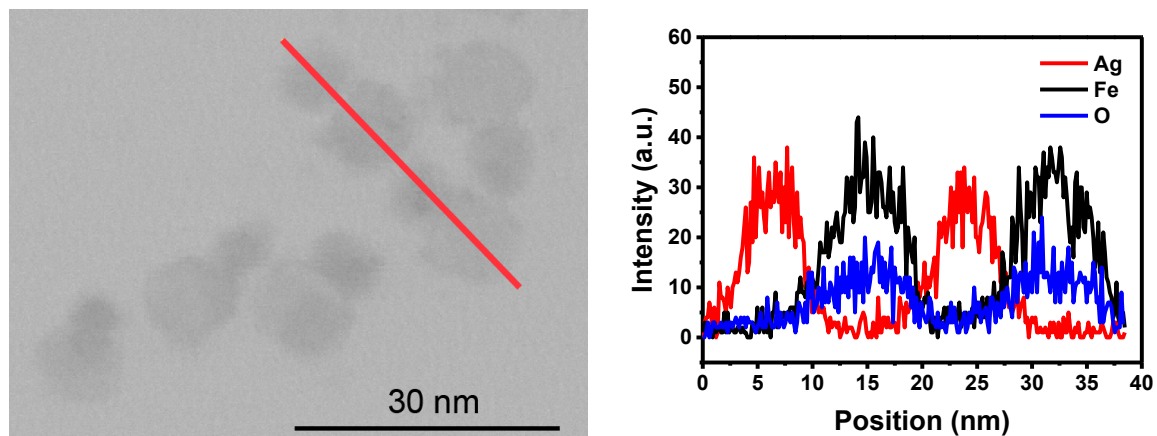

Fig. S7. EDX line scan of dispersed Ag-Fe<sub>3</sub>O<sub>4</sub> dimers showing the elemental distribution of Ag, Fe and O.

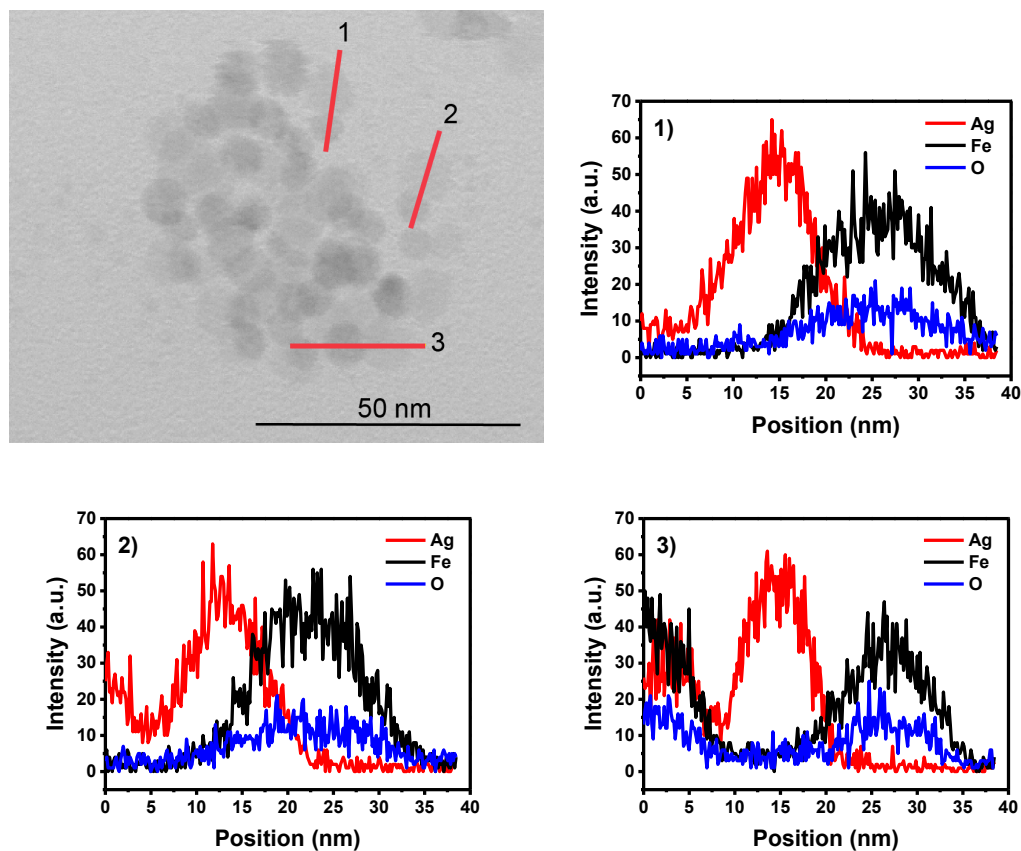

Fig. S8. EDX line scans of aggregated Ag-Fe<sub>3</sub>O<sub>4</sub> dimers showing the elemental distribution of Ag, Fe and O.
